# Supplementary material
Source: publisher figshare collection journal article supplement (https://karger.figshare.com/ndownloader/files/26848529)
Supplement: Supplementary file 1 [file 26848529]

| a |
| --- |
| WhiB1 ------------------------------------------------------------  WhiB1_pKT25 TGACCAGCGGCGATTCGGTGACCGATTACCTGGCGCGCACGCGGCGGGCTGCAGGGTCGA  WhiB1 --------ATGGACTGGCGAAGCAAAGCGGCCTGTCTCGACGAGGACCCGGAACTGTTCT  WhiB1_pKT25 CTCTAGAGATGGACTGGCGAAGCAAAGCGGCCTGTCTCGACGAGGACCCGGAACTGTTCT  ****************************************************  WhiB1 TCCCCATCGGGAACACGGGCCCGGCCATCGAGCAGATCGAGAAGGCCAAGAAGGTCTGCG  WhiB1_pKT25 TCCCCATCGGGAACACGGGCCCGGCCATCGAGCAGATCGAGAAGGCCAAGAAGGTCTGCG  ************************************************************  WhiB1 CGCGGTGCGAGGTCACAGAGACCTGCCTGCAGTGGGCGATCGAGACCGGCCAGGACGCCG  WhiB1_pKT25 CGCGGTGCGAGGTCACAGAGACCTGCCTGCAGTGGGCGATCGAGACCGGCCAGGACGCCG  ************************************************************  WhiB1 GCGTGTGGGGCGGTCTCTCCGAGGACGAGCGCCGCGCCCTGAAGCGACGCAACGCGCGCG  WhiB1_pKT25 GCGTGTGGGGCGGTCTCTCCGAGGACGAGCGCCGCGCCCTGAAGCGACGCAACGCGCGCG  ************************************************************  WhiB1 CCCGCCGCGCCAGCTGA-------------------------------------------  WhiB1_pKT25 CCCGCCGCGCCAGCTGAGGTACCTAAGTAAGTAAGAATTCACTGGCCGTCGTTTTACAAC  ***************** |
| b |
| WhiB2 ----------GTGCACGAACTTCAGATCGTCGGACATCCCGAGCAGGCCGTTCCCAGTTG  WhiB2_pKT25 GACTCTAGAGATGCACGAACTTCAGATCGTCGGACATCCCGAGCAGGCCGTTCCCAGTTG  *************************************************  WhiB2 GCAGGAGCGCGCCCTGTGCGCCCAGACCGACCCCGAGGCCTTCTTCCCCGAGAAGGGTGG  WhiB2_pKT25 GCAGGAGCGCGCCCTGTGCGCCCAGACCGACCCCGAGGCCTTCTTCCCCGAGAAGGGTGG  ************************************************************  WhiB2 CTCCACGCGCGAGGCCAAGCGCGTCTGCACCGGCTGCGACGTGCGTTCCGAGTGCCTCGA  WhiB2_pKT25 CTCCACGCGCGAGGCCAAGCGCGTCTGCACCGGCTGCGACGTGCGTTCCGAGTGCCTCGA  ************************************************************  WhiB2 CTACGCCCTCGAGAACGATGAGCGCTTCGGCATCTGGGGTGGCCTGTCCGAGCGGGAGCG  WhiB2_pKT25 CTACGCCCTCGAGAACGATGAGCGCTTCGGCATCTGGGGTGGCCTGTCCGAGCGGGAGCG  ************************************************************  WhiB2 CCGCAAGCTCAAGCGGCGCGCGGTCTTCACCGCCTGA-----------------------  WhiB2_pKT25 CCGCAAGCTCAAGCGGCGCGCGGTCTTCACCGCCTGAGGTACCTAAGTAAGTAAGAATTC  ************************************* |
| c |
| WhiB3 ------------------------------------------------------------  WhiB3_pKT25 CAGCGGCGATTCGGTGACCGATTACCTGGCGCGCACGCGGCGGGCTGCAGGGTCGACTCT  WhiB3 ----ATGGACAGCACGGCTCGCCAACCGGGCCCGGTTGCCGACTTGTGGGACTGGCAATT  WhiB3_pKT25 AGAGATGGACAGCACGGCTCGCCAACCGGGCCCGGTTGCCGACTTGTGGGACTGGCAATT  ********************************************************    WhiB3 TGAGGGATTGTGCCGTACCACAGACCCGGAAGAGTTCTTCCATCCGGAAGGTGAACGTGG  WhiB3_pKT25 TGAGGGATTGTGCCGTACCACAGACCCGGAAGAGTTCTTCCATCCGGAAGGTGAACGTGG  ************************************************************  WhiB3 CTCTGCCCGTCGTCTGCGCGACGAGCGTGCTAAACGTGTCTGCCAACGCTGTCCTGTGAT  WhiB3_pKT25 CTCTGCCCGTCGTCTGCGCGACGAGCGTGCTAAACGTGTCTGCCAACGCTGTCCTGTGAT  ************************************************************  WhiB3 TCTTGAGTGCCGTGAACACGCATTAGCAGCGAAGGAACCTTATGGAGTCTGGGGGGGCTT  WhiB3_pKT25 TCTTGAGTGCCGTGAACACGCATTAGCAGCGAAGGAACCTTATGGAGTCTGGGGGGGCTT  ************************************************************  WhiB3 GAGCGAAGACGAACGTGAACAAGAACTGGCACGTCGTTCGCGTCGCGGGCTTCGTGGTGC  WhiB3_pKT25 GAGCGAAGACGAACGTGAACAAGAACTGGCACGTCGTTCGCGTCGCGGGCTTCGTGGTGC  ************************************************************  WhiB3 ATGA--------------------------------------------------------  WhiB3_pKT25 ATGAGGTACCTAAGTAAGTAAGAATTCACTGGCCGTCGTTTTACAACGTCGTGACTGGGA  **** |
| d |
| WhiB7 ------------------------------------------------------------  WhiB7_pKT25 CCAGCGGCGATTCGGTGACCGATTACCTGGCGCGCACGCGGCGGGCTGCAGGGTCGACTC  WhiB7 -----ATGTTGGCCCTGGCAGATCACCAGACACTCATCGACCAAGCCCGTGTGGCCGGGC  WhiB7_pKT25 TAGAGATGTTGGCCCTGGCAGATCACCAGACACTCATCGACCAAGCCCGTGTGGCCGGGC  *******************************************************  WhiB7 GCCCCCTGCCCTGCCTCGAGAACGACCCCGACACCTGGTTCGCCGACACCCCCACGGGTG  WhiB7_pKT25 GCCCCCTGCCCTGCCTCGAGAACGACCCCGACACCTGGTTCGCCGACACCCCCACGGGTG  ************************************************************  WhiB7 TCGAGTACGCCAAGTCCCTGTGCCACGCCTGCCCCGTGCGCACCCTCTGCCTCGAGGGTG  WhiB7_pKT25 TCGAGTACGCCAAGTCCCTGTGCCACGCCTGCCCCGTGCGCACCCTCTGCCTCGAGGGTG  ************************************************************  WhiB7 CCTTGGAACGCCGCGAGCCCTGGGGTGTGTGGGGCGGCGAGCTCATCGAGGCCGGCCGGG  WhiB7_pKT25 CCTTGGAACGCCGCGAGCCCTGGGGTGTGTGGGGCGGCGAGCTCATCGAGGCCGGCCGGG  ************************************************************  WhiB7 TGCTGCCGCGAAAGCGTCCGCGAGGACGTCCGCGCAAGCACCCCATCGCGGCCTGA----  WhiB7_pKT25 TGCTGCCGCGAAAGCGTCCGCGAGGACGTCCGCGCAAGCACCCCATCGCGGCCTGAGGTA  ********************************************************  WhiB7 ------------------------------------------------------------  WhiB7_pKT25 CCTAAGTAAGTAAGAATTCACTGGCCGTCGTTTTACAACGTCGTGACTGGGAAAACCCTG |
| e |
| σA_CTD -------------------------------ATGGACGCTGTCTCCTTCACCCTTTTGCA  σA_CTD_pUT18 AACAGCTATGACCATGATTACGCCAAGCTTGATGGACGCTGTCTCCTTCACCCTTTTGCA  *****************************  σA_CTD GGAACAGCTTCATTCCGTGCTTGACACACTTAGCGAGCGTGAGGCGGGAGTAGTCTCAAT  σA_CTD_pUT18 GGAACAGCTTCATTCCGTGCTTGACACACTTAGCGAGCGTGAGGCGGGAGTAGTCTCAAT  ************************************************************  σA_CTD GCGCTTTGGGTTAGCCGACGGCCAGCCGAAAACTCTGGATGAAATTGGGCGTGTCTATGG  σA_CTD_pUT18 GCGCTTTGGGTTAGCCGACGGCCAGCCGAAAACTCTGGATGAAATTGGGCGTGTCTATGG  ************************************************************  σA_CTD CGTCACGCGCGAACGTATTCGTCAGATTGAATCCAAGACGATGTCTAAATTACGCCATCC  σA_CTD_pUT18 CGTCACGCGCGAACGTATTCGTCAGATTGAATCCAAGACGATGTCTAAATTACGCCATCC  ************************************************************  σA_CTD TTCCCGTTCTCAAGTTCTTCGCGACTATTTAGACTGA-----------------------  σA_CTD_pUT18 TTCCCGTTCTCAAGTTCTTCGCGACTATTTAGACCGGGTACCGAGCTCGAATTCAGCCGC  ********************************** * |
| f |
| σB ------------------------------ATGATTCACGACGATTTTCCGGCCCGTACA  σB_pUT18 ACAGCTATGACCATGATTACGCCAAGCTTGATGATTCACGACGATTTTCCGGCCCGTACA  ******************************  σB CATGGTGCATCTCATGCTGTACCGGACCAGGCTCTGGTCCGTCGCCGCTTAACGGCTGCC  σB_pUT18 CATGGTGCATCTCATGCTGTACCGGACCAGGCTCTGGTCCGTCGCCGCTTAACGGCTGCC  ************************************************************  σB CACGCCTTGCCCGAACAACACCGCCAACAAGAACTTATTGATGTGATCGCAGATCATATC  σB_pUT18 CACGCCTTGCCCGAACAACACCGCCAACAAGAACTTATTGATGTGATCGCAGATCATATC  ************************************************************  σB CCTTTCGCGCGCCGTCTTGGTCGTCGTTTCGCTCCCACTCCGTCCCTTGTAGACGATTGC  σB_pUT18 CCTTTCGCGCGCCGTCTTGGTCGTCGTTTCGCTCCCACTCCGTCCCTTGTAGACGATTGC  ************************************************************  σB GAACAAGTTGCCTGTATGGCTCTGGTCTTAGCTGTTCAACGCTGGGATCCTGCGTTTGAC  σB_pUT18 GAACAAGTTGCCTGTATGGCTCTGGTCTTAGCTGTTCAACGCTGGGATCCTGCGTTTGAC  ************************************************************  σB GCCAATTTGAGCAGTTACGCGCAGCCTACCATTCTTGGGGAATTGCGTCGCTTCTTACGT  σB_pUT18 GCCAATTTGAGCAGTTACGCGCAGCCTACCATTCTTGGGGAATTGCGTCGCTTCTTACGT  ************************************************************  σB GACTCGACGTGGTGGGTCCGTCCTCCCCGTCGTATCCAGGAGTTGGCCGCGTTAGTACGC  σB_pUT18 GACTCGACGTGGTGGGTCCGTCCTCCCCGTCGTATCCAGGAGTTGGCCGCGTTAGTACGC  ************************************************************  σB TCTACTGAGGAAGAACTTCGTCACAGTACTGGCCGTGAGCCCACTGCGCAGGAAGTCGCT  σB_pUT18 TCTACTGAGGAAGAACTTCGTCACAGTACTGGCCGTGAGCCCACTGCGCAGGAAGTCGCT  ************************************************************  σB CGTGCTGTTGGGGCATCACCCGATGAGGTGTCGGAGGCTCGCGTCGCCGCCGCTGGGCGT  σB_pUT18 CGTGCTGTTGGGGCATCACCCGATGAGGTGTCGGAGGCTCGCGTCGCCGCCGCTGGGCGT  ************************************************************  σB TACGTGGCTTCAGTTGACGAGGAAGACCCTGAAACAGGGCGTCTTGTACATCTGGTACAC  σB_pUT18 TACGTGGCTTCAGTTGACGAGGAAGACCCTGAAACAGGGCGTCTTGTACATCTGGTACAC  ************************************************************  σB AGCCCTGCCGTCGATGAATGGGTATCGTTACACCCACATATCCAGGCCCTTGACCCTCGT  σB_pUT18 AGCCCTGCCGTCGATGAATGGGTATCGTTACACCCACATATCCAGGCCCTTGACCCTCGT  ************************************************************  σB GACCGTTGCGTGCTGTTACGCCGCTATCTTGAAGATGAAACCCAAGCCTCCATTGCGCGT  σB_pUT18 GACCGTTGCGTGCTGTTACGCCGCTATCTTGAAGATGAAACCCAAGCCTCCATTGCGCGT  ************************************************************  σB GCGCTTGGCATCAGTCAGGCACAAGTCTCACGCCGCTTGAAACGCGCACTGGATACGCTT  σB_pUT18 GCGCTTGGCATCAGTCAGGCACAAGTCTCACGCCGCTTGAAACGCGCACTGGATACGCTT  ************************************************************  σB CGCGAGCAAGTTCCGGGAGGTTTATCGAATGCCTGA------------------------  σB_pUT18 CGCGAGCAAGTTCCGGGAGGTTTATCGAATGCCCGGGGTACCGAGCTCGAATTCAGCCGC  ********************************* * |
| g |
| σH -------------------------------------ATGACACCCACCACCAGCGAGAA  σH_pUT18 ACAGGAAACAGCTATGACCATGATTACGCCAAGCTTGATGACACCCACCACCAGCGAGAA  ***********************  σH GCCCCGCTCGGAGGTGAACAGCGACCCGGCAGAGGTCGACGTGGCCACCGAGACGCCCCA  σH_pUT18 GCCCCGCTCGGAGGTGAACAGCGACCCGGCAGAGGTCGACGTGGCCACCGAGACGCCCCA  ************************************************************  σH GGAGCGCGCTGCGCGCTTCGAGCGCGAGGCGCTGCCCCATCTGGACCAGCTGTACAGCGC  σH_pUT18 GGAGCGCGCTGCGCGCTTCGAGCGCGAGGCGCTGCCCCATCTGGACCAGCTGTACAGCGC  ************************************************************  σH GGCCCTGCGCACGACGCGTAACCCGACCGACGCCGAGGACCTGGTGCAGGAGACCTACGC  σH_pUT18 GGCCCTGCGCACGACGCGTAACCCGACCGACGCCGAGGACCTGGTGCAGGAGACCTACGC  ************************************************************  σH CAAGGCGTACGCGGCGTTCCACCAGTACAAGCCGGGCACCAACCTCAAGGCGTGGATGTA  σH_pUT18 CAAGGCGTACGCGGCGTTCCACCAGTACAAGCCGGGCACCAACCTCAAGGCGTGGATGTA  ************************************************************  σH CCGCATTCTCACCAACACGTACATCAACACCTACCGTAAGAAGCAGCGCCAGCCGCTGCA  σH_pUT18 CCGCATTCTCACCAACACGTACATCAACACCTACCGTAAGAAGCAGCGCCAGCCGCTGCA  ************************************************************  σH GTCCGACGCCGCCGAGGTGGAGGACTACCAGTTGGCCGCAGCGGAGTCGCACACCGCCAA  σH_pUT18 GTCCGACGCCGCCGAGGTGGAGGACTACCAGTTGGCCGCAGCGGAGTCGCACACCGCCAA  ************************************************************  σH GGGGCTGCGCTCCGCCGAGACCGAGGCGCTGGACCACATCGCCGACTCCCAAGTGACCGA  σH_pUT18 GGGGCTGCGCTCCGCCGAGACCGAGGCGCTGGACCACATCGCCGACTCCCAAGTGACCGA  ************************************************************  σH CGCCCTGGCCCAGCTGAGTGAGGAGTTCCGCCTGGCGGTGTACCTGGCCGACGTGGAGGG  σH_pUT18 CGCCCTGGCCCAGCTGAGTGAGGAGTTCCGCCTGGCGGTGTACCTGGCCGACGTGGAGGG  ************************************************************  σH CTTCGCCTACAAGGAGATCGCGGAGATCATGGACACGCCGATCGGCACCGTGATGTCTCG  σH_pUT18 CTTCGCCTACAAGGAGATCGCGGAGATCATGGACACGCCGATCGGCACCGTGATGTCTCG  ************************************************************  σH CCTGCACCGGGGAAGAAAGCAGCTGCGGGAGCTGTTGGCCGAGTACGGAGCCGAACGCGG  σH_pUT18 CCTGCACCGGGGAAGAAAGCAGCTGCGGGAGCTGTTGGCCGAGTACGGAGCCGAACGCGG  ************************************************************  σH CTTCGGCCGGCAGTCCCAAGGTAAGGAGGTCTCCTCGTGA--------------------  σH_pUT18 CTTCGGCCGGCAGTCCCAAGGTAAGGAGGTCTCCTCGCGGGTACCGAGCTCGAATTCAGC  ************************************* * |
| h |
| σJ ---------------------------------------------------------ATG  σJ_pUT18 AGATTGTACTGAGAGAAAGGCAATTGGGTACCGAGCTCGCGGCCGCAAGCAAGCTTGATG  ***  σJ GAAATGTCTCGTGTGGACCTGGAGCGTTTTGAGGTCGCCCGTGGACGTTTGGGTGCCGTC  σJ_pUT18 GAAATGTCTCGTGTGGACCTGGAGCGTTTTGAGGTCGCCCGTGGACGTTTGGGTGCCGTC  ************************************************************  σJ GCTTATCGTCTGCTTGGGTCAGCTAGCGAAGCTGAAGATGTGGTACAAGAGTCCTTTGTC  σJ_pUT18 GCTTATCGTCTGCTTGGGTCAGCTAGCGAAGCTGAAGATGTGGTACAAGAGTCCTTTGTC  ************************************************************  σJ CGTTGGCAGGCAGCCGACCGCGGTCGCATCGAAGTGCCCGTGGCGTGGTTGACTAAGGTT  σJ_pUT18 CGTTGGCAGGCAGCCGACCGCGGTCGCATCGAAGTGCCCGTGGCGTGGTTGACTAAGGTT  ************************************************************  σJ GTTACCAATTTATGTTTAAACCAGCTTACCAGCGCACGTTCTCGTCGTGAAGAATACGTG  σJ_pUT18 GTTACCAATTTATGTTTAAACCAGCTTACCAGCGCACGTTCTCGTCGTGAAGAATACGTG  ************************************************************  σJ GGTCAATGGCTGCCCGAGCCTCTGCTTGATGGGGATCCTATGTTAGGGCCTGCAGAAACC  σJ_pUT18 GGTCAATGGCTGCCCGAGCCTCTGCTTGATGGGGATCCTATGTTAGGGCCTGCAGAAACC  ************************************************************  σJ TTGGAACAACGCGGGAGTGTTAGCTTAGCAATGTTGATGATCCTGGAAACTCTTAGTCCC  σJ_pUT18 TTGGAACAACGCGGGAGTGTTAGCTTAGCAATGTTGATGATCCTGGAAACTCTTAGTCCC  ************************************************************  σJ ACCGAACGCGCAGTGTACGTGCTTCGCGAGGCGTTCGCTGTCCCTCATGGTGAAATTGCG  σJ_pUT18 ACCGAACGCGCAGTGTACGTGCTTCGCGAGGCGTTCGCTGTCCCTCATGGTGAAATTGCG  ************************************************************  σJ GAAATTTTGGAAACTACGCCCGCTGCGACACAGCAAGCGTTATCCCGCGCTAAAAGCCGT  σJ_pUT18 GAAATTTTGGAAACTACGCCCGCTGCGACACAGCAAGCGTTATCCCGCGCTAAAAGCCGT  ************************************************************  σJ ATCGCATCTTTGTCGCATCGTCACCGCACAGAAGCGGACCCTGTCGCTGCACGTGCTATC  σJ_pUT18 ATCGCATCTTTGTCGCATCGTCACCGCACAGAAGCGGACCCTGTCGCTGCACGTGCTATC  ************************************************************  σJ GTAGAAGAGTTTTTGGCAGCCGCAACTAGCGGTCGCGTTGAAAATTTGGTCCGTCTGTTG  σJ_pUT18 GTAGAAGAGTTTTTGGCAGCCGCAACTAGCGGTCGCGTTGAAAATTTGGTCCGTCTGTTG  ************************************************************  σJ ACTGATGACGCGTTCGGCATTGGGGACGGCGGAGGGGCGGTTCCCGCCCGTCCTAAACCA  σJ_pUT18 ACTGATGACGCGTTCGGCATTGGGGACGGCGGAGGGGCGGTTCCCGCCCGTCCTAAACCA  ************************************************************  σJ GTCCTGGGGGCTCAGTCCGTCGCCAAGATGTTACGTGGATTAGCGGTTCCTTCAGCCGCC  σJ_pUT18 GTCCTGGGGGCTCAGTCCGTCGCCAAGATGTTACGTGGATTAGCGGTTCCTTCAGCCGCC  ************************************************************  σJ AAGCGTGAGTTAGCAGGAGGCAGCTTAGATTGTCATTTCGCACTGGTCAATACATCCCCG  σJ_pUT18 AAGCGTGAGTTAGCAGGAGGCAGCTTAGATTGTCATTTCGCACTGGTCAATACATCCCCG  ************************************************************  σJ GCCTTGGTGGCAGTAGTAGCGGGGCGCGTTGTAGGTGTAATCGTGCTTGATATTGCCGAC  σJ_pUT18 GCCTTGGTGGCAGTAGTAGCGGGGCGCGTTGTAGGTGTAATCGTGCTTGATATTGCCGAC  ************************************************************  σJ GGACGTATCTCGGTGGTGCGTATTCAGGCCAATCCTCACAAACTTGACCGTGCGACTCGT  σJ_pUT18 GGACGTATCTCGGTGGTGCGTATTCAGGCCAATCCTCCCAAACTTGACCGTGCGACTCGT  ************************************************************  σJ CGCTGGGCTGCTTCACCTCACGGTCGCCCGTTGCTGAGTGGGTGGTGA------------  σJ_pUT18 CGCTGGGCTGCTTCACCTCACGGTCGCCCGTTGCTGAGTGGGTGGCGGGTACCACCTGCT  ********************************************* * |
| i |
| whiB1 -------ATGGACTGGCGAAGCAAAGCGGCCTGTCTCGACGAGGACCCGGAACTGTTCTT  whiB1_pMyNT GGGCGCCATGGACTGGCGAAGCAAAGCGGCCTGTCTCGACGAGGACCCGGAACTGTTCTT  *****************************************************  whiB1 CCCCATCGGGAACACGGGCCCGGCCATCGAGCAGATCGAGAAGGCCAAGAAGGTCTGCGC  whiB1_pMyNT CCCCATCGGGAACACGGGCCCGGCCATCGAGCAGATCGAGAAGGCCAAGAAGGTCTGCGC  ************************************************************  whiB1 GCGGTGCGAGGTCACAGAGACCTGCCTGCAGTGGGCGATCGAGACCGGCCAGGACGCCGG  whiB1_pMyNT GCGGTGCGAGGTCACAGAGACCTGCCTGCAGTGGGCGATCGAGACCGGCCAGGACGCCGG  ************************************************************  whiB1 CGTGTGGGGCGGTCTCTCCGAGGACGAGCGCCGCGCCCTGAAGCGACGCAACGCGCGCGC  whiB1_pMyNT CGTGTGGGGCGGTCTCTCCGAGGACGAGCGCCGCGCCCTGAAGCGACGCAACGCGCGCGC  ************************************************************  whiB1 CCGCCGCGCCAGCTGA--------------------------------------------  whiB1_pMyNT CCGCCGCGCCAGCTGAAAGCTTATCGATGTCGACGTAGTTAACTAGCGTACGATCGACTG  **************** |
| j |
| whiB2 -------GTGCACGAACTTCAGATCGTCGGACATCCCGAGCAGGCCGTTCCCAGTTGGCA  whiB2_pMyNT GGGCGCCATGGACGAACTTCAGATCGTCGGACATCCCGAGCAGGCCGTTCCCAGTTGGCA  ** *************************************************  WhiB2 GGAGCGCGCCCTGTGCGCCCAGACCGACCCCGAGGCCTTCTTCCCCGAGAAGGGTGGCTC  whiB2_pMyNT GGAGCGCGCCCTGTGCGCCCAGACCGACCCCGAGGCCTTCTTCCCCGAGAAGGGTGGCTC  ************************************************************  whiB2 CACGCGCGAGGCCAAGCGCGTCTGCACCGGCTGCGACGTGCGTTCCGAGTGCCTCGACTA  whiB2_pMyNT CACGCGCGAGGCCAAGCGCGTCTGCACCGGCTGCGACGTGCGTTCCGAGTGCCTCGACTA  ************************************************************  whiB2 CGCCCTCGAGAACGATGAGCGCTTCGGCATCTGGGGTGGCCTGTCCGAGCGGGAGCGCCG  whiB2_pMyNT CGCCCTCGAGAACGATGAGCGCTTCGGCATCTGGGGTGGCCTGTCCGAGCGGGAGCGCCG  ************************************************************  whiB2 CAAGCTCAAGCGGCGCGCGGTCTTCACCGCCTGA--------------------------  whiB2_pMyNT CAAGCTCAAGCGGCGCGCGGTCTTCACCGCCTGAAAGCTTATCGATGTCGACGTAGTTAA  ********************************** |
| Supplementary fig 1. Nucleotide sequences of relevant regions of plasmids used in the bacterial two-hybrid experiments (a-h) and for overproduction of WhiB proteins in *M. smegmatis* (I and j). Engineered restriction sites are indicated in blue font, changes to the wild-type DNA sequences to facilitate ligation into the vectors and remove stop codons to create σ-T18 fusions and maintain the reading frame for T25-WhiB fusions are shown in red font. |
